# Supplementary material
Source: PubMed Central journal article supplement (PMC3877829)
Supplement: supp_tpc.113.115519_tpc115519Supplemental.pdf [file supp_tpc.113.115519_tpc115519Supplemental.pdf]

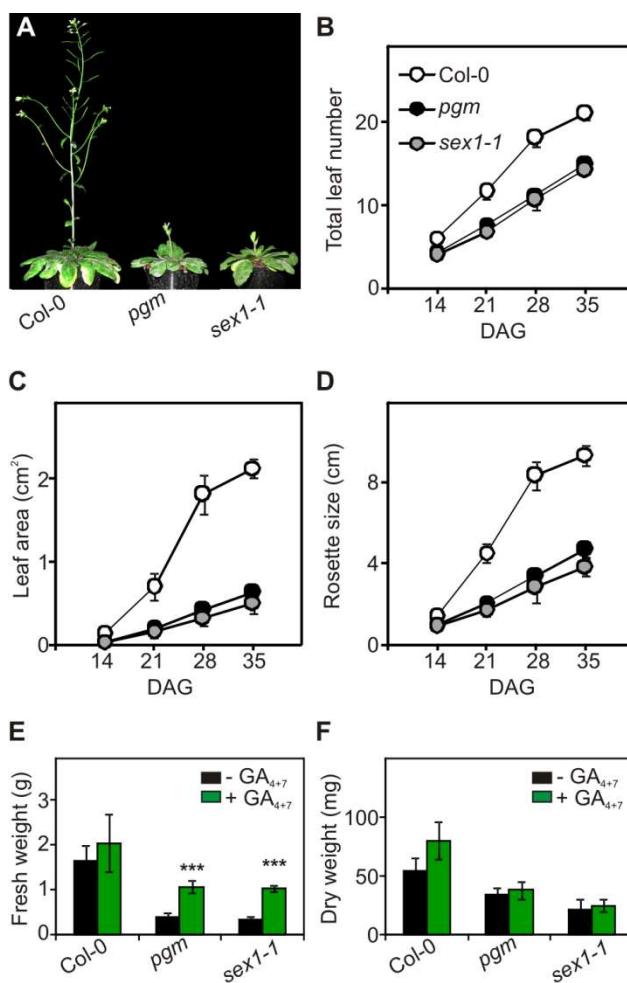

**Supplemental Figure 1.** Phenotypes of *pgm* and *sex1-1* mutants grown in a 12hL:12hD photoperiod.

**(A)** Photograph of 6-week-old Col-0, *pgm* and *sex1-1* plants. Note the delay in flowering of both mutants.

**(B-D)** Total rosette leaves number **(B)**, area of the first two leaves **(C)**, and diameter of the entire rosette **(D)** in each genotype from 14 to 35 days after germination. Data are the average ( $\pm$  SD) of independent plants ( $n = 10$ ).

**(E-F)** Fresh weight **(E)** and dry weight **(F)** of 4-week-old plants treated without (-GA<sub>4+7</sub>) or with 10  $\mu$ M GA<sub>4+7</sub> (+GA<sub>4+7</sub>), as described in Methods section. Results are means ( $\pm$  SD) of three independent experiments ( $n = 20$ ). Asterisks indicate significant differences between control and treated plants (2-way ANOVA; \*\*\* $P < 0.001$ ).

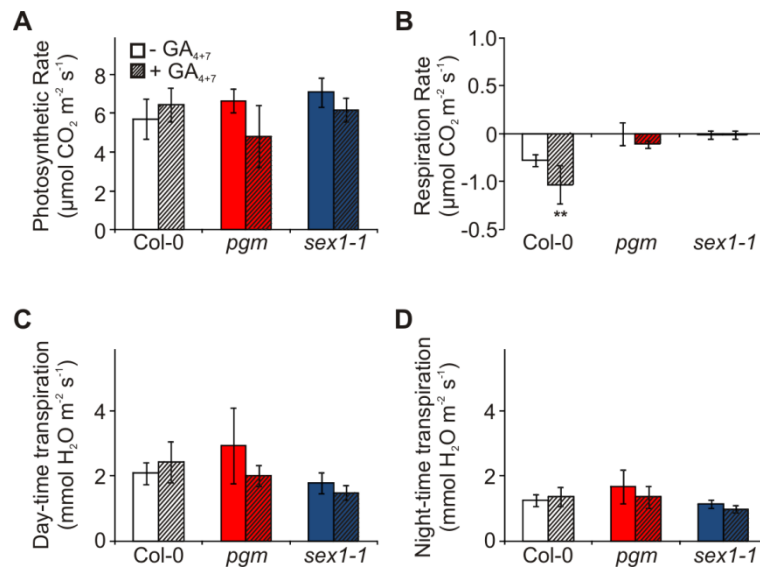

**Supplemental Figure 2.** Effect of GA treatment on photosynthesis, respiration, and transpiration rates in leaves of Col-0, *pgm* and *sex1-1* plants.

**(A)** Photosynthetic CO<sub>2</sub> fixation was quantified over the entire light phase.

**(B)** Respiratory CO<sub>2</sub> release was quantified over the entire dark phase.

**(C-D)** Day-time **(C)** and night-time **(D)** H<sub>2</sub>O transpiration, and consequently stomatal conductance, in each genotype and condition.

Measures were taken after two weeks of treatment with GAs. Values represent means (± SD) of 15 measurements on 4 separate plants for each genotype. None of the differences between control and treated plants are significant, except for the Col-0 in B (2-way ANOVA, \*\*P < 0.01).

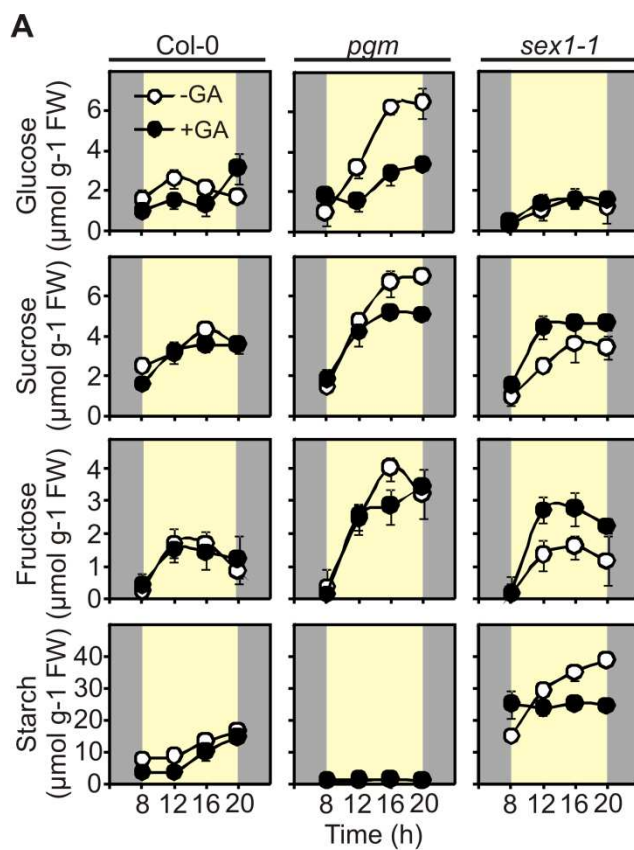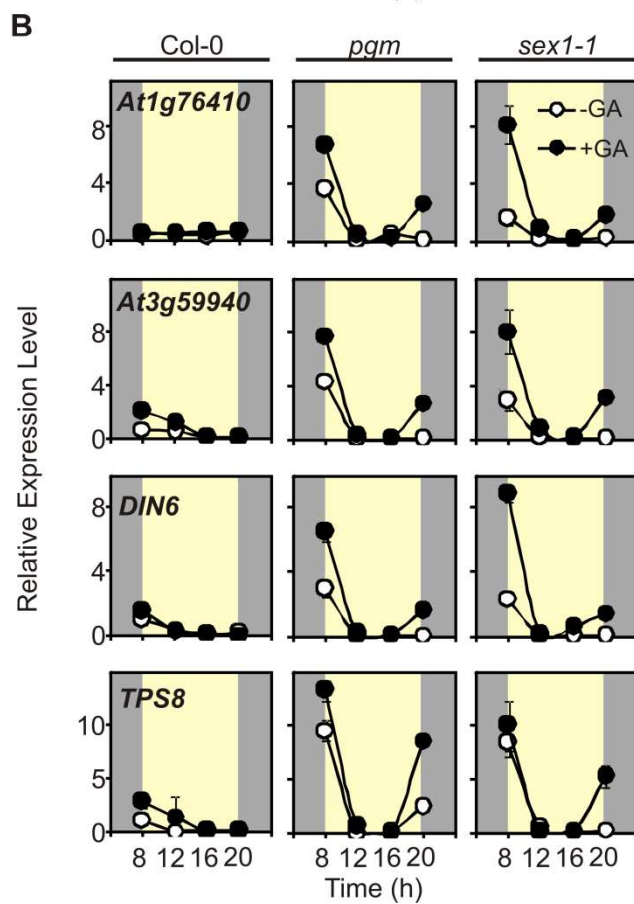

**Supplemental Figure 3.** Exogenous GA-treatment disrupts the normal expression pattern of starvation genes.

**(A)** Plants were grown in a 12hL:12hD photoperiod and treated with GA<sub>4+7</sub> for 2 weeks. Plants were sampled every 4-h during the light phase and levels of glucose, sucrose, fructose and starch were measured in leaves of control plants (*open circles*) and GA-treated plants (*filled circles*). The same analysis was performed in Col-0, *pgm* and *sex1-1*. Each point represents the mean ( $\pm$  SD) of three biological replicates.

**(B)** Transcript levels of four starvation-related genes (*At1g76410*, *At3g59940*, *DIN6*, and *TPS8*) (Usadel et al., 2008) in GA-treated Col-0, *pgm* and *sex1-1* plants. Expression levels are expressed as relative units, assuming as unitary the value of -GA Col-0 at the beginning of the day. Each value is the mean ( $\pm$  SD) of three independent measurements. Background shading: yellow, day; grey, night.

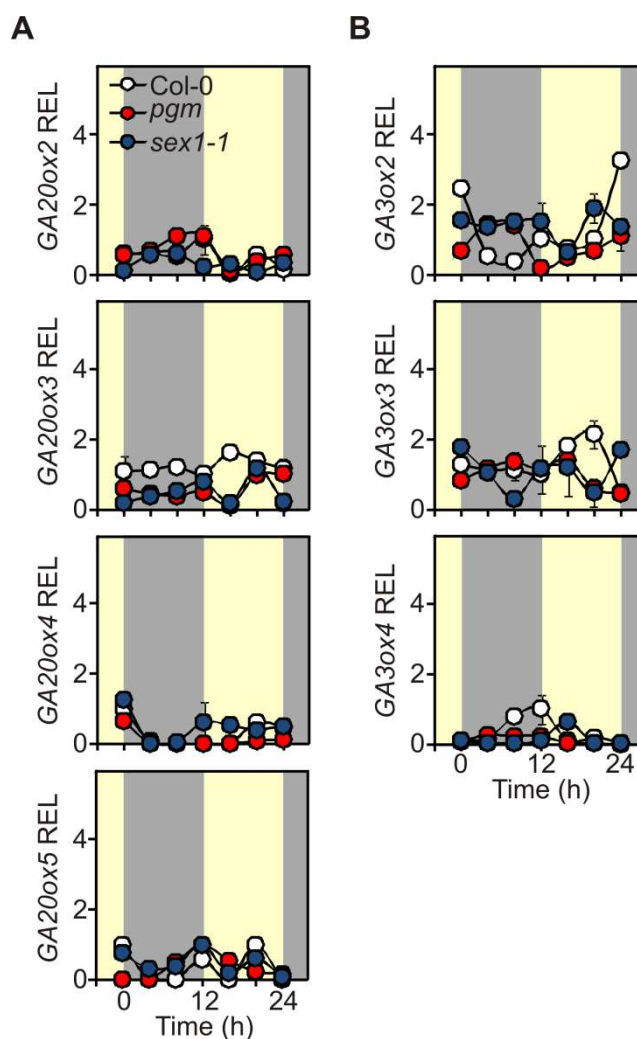

**Supplemental Figure 4.** Diurnal changes in the relative expression levels of genes encoding enzymes involved in the late steps of GA biosynthesis in Col-0 (empty circles), *pgm* (red circles) and *sex1-1* (blue circles) plants grown under 12hL:12hD photoperiod.

RT-qPCR analysis of relative transcript levels of **(A)** *GA20ox* genes (*GA20ox2*, At5g51810; *GA20ox3*, At5g07200; *GA20ox4*, At1g60980; *GA20ox5*, At1g44090), and **(B)** *GA3ox* genes (*GA3ox2*, At1g80340; *GA3ox3*, At4g21690; *GA3ox4*, At1g80330).

Expression levels are expressed as relative units assuming as unitary the value of wild-type (Col-0) at the beginning of the day (0h). Data are mean of three replicates ( $\pm$  SD). Yellow background, day; grey background, night. (see Supplemental Table 4 online for RT-qPCR primers list).

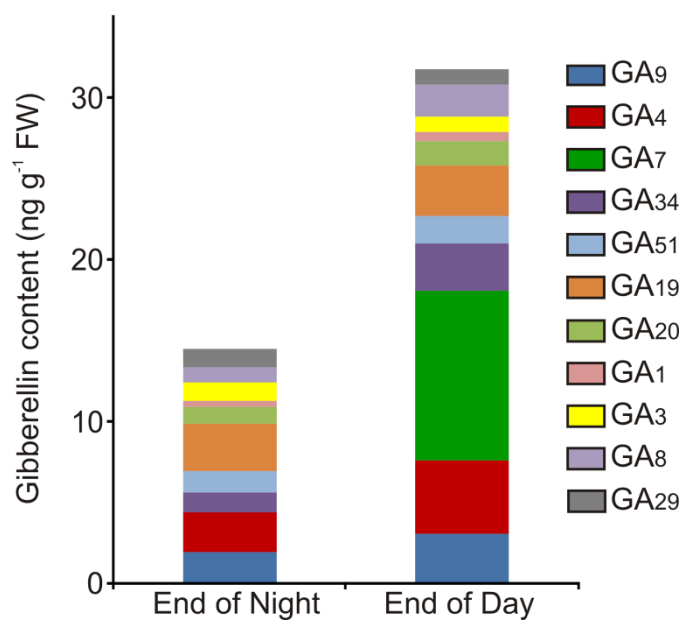

**Supplemental Figure 5.** Level of GAs (ng g<sup>-1</sup> FW) in Col-0 at the end of night (8 am, EN) and end of day (8 pm, ED). Values are means of three independent replicates (see Supplemental Table 2 online).

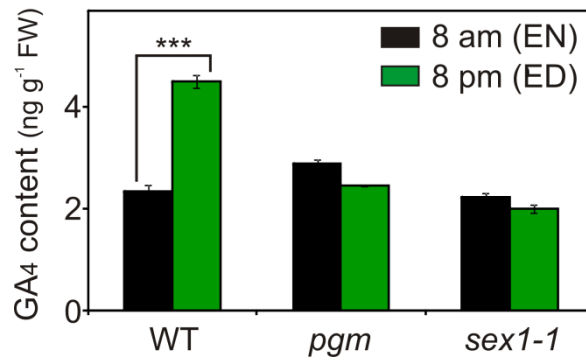

**Supplemental Figure 6.** Comparison of GA<sub>4</sub> content (ng g<sup>-1</sup> FW) in Col-0, *pgm* and *sex1-1* at the end of night (8 am, EN) and end of day (8 pm, ED). Values are means of three replicates ( $\pm$  SD). Asterisks indicate significant differences from the wild-type at 8 am (2-way ANOVA; \*\*\*P < 0.001).

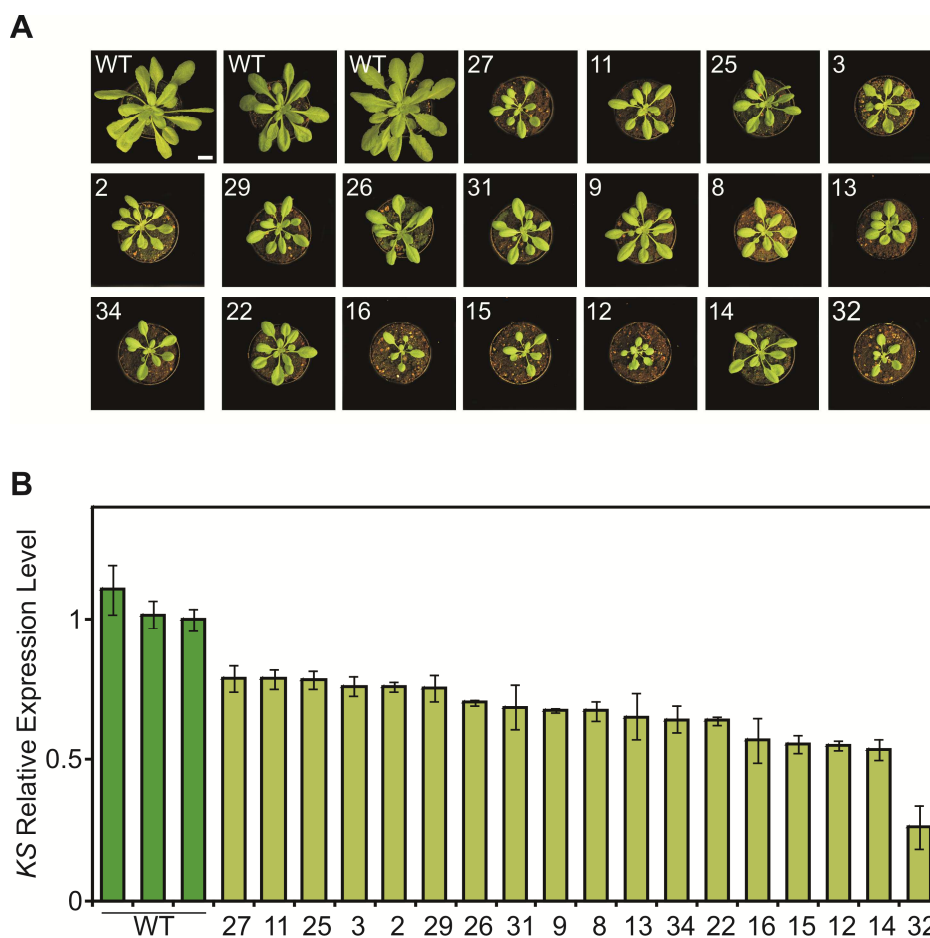

**Supplemental Figure 7.** Screening of *KSi* lines grown in a 12hL:12hD photoperiod. Comparison of phenotype and *KS* transcript levels.

**(A)** Photograph of 4-week-old Col-0 and transgenic *KSi* plants. White bar = 1.5 cm.

**(B)** RT-qPCR analysis of relative transcript levels of *KS* in wild-type plants and transgenic confirmed lines at 4 pm. X-axis values correspond to individual plants shown in **(A)**. Expression levels are expressed as relative units assuming as unitary the value of the second wild-type (WT) in panel A. (see Supplemental Tables 4 and 5 online for RT-qPCR and screening primers list). Data are mean of three replicates ( $\pm$  SD).



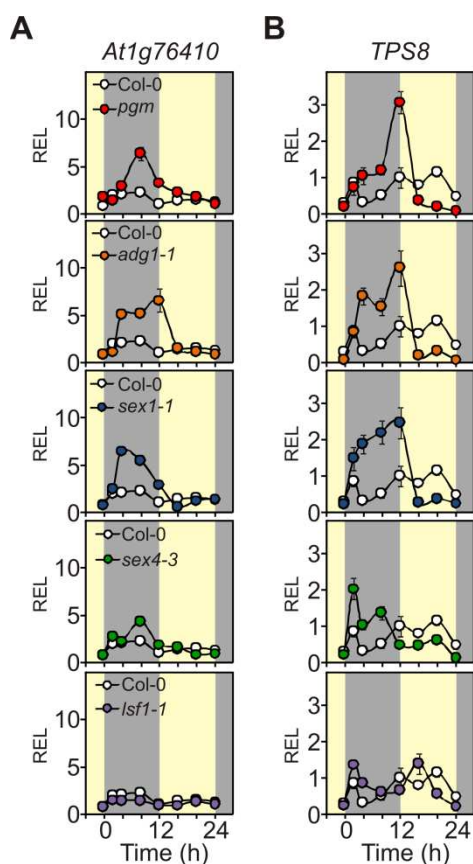

**Supplemental Figure 8.** Altered expression of sugar-starvation marker genes in starch mutants.

The transcript levels of two sugar-starvation marker genes (Usadel et al., 2008) in Col-0 and the starch mutants were analyzed. Plants were grown in 12hL:12hD photoperiod (grey/yellow background corresponds to night/day). See Figure 4 legend for a detailed description of the experiment.

**(A)** *At1g76410*

**(B)** *TPS8*

The relative expression level (REL) at the end of night of wild-type (Col-0) was set to 1. Values are means ( $\pm$  SD) of three independent replicates. Background shading: yellow, day; grey, night.

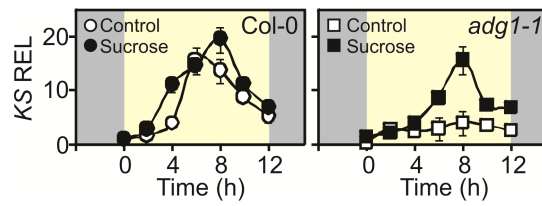

**Supplemental Figure 9.** Sucrose supplementation in *adg1-1* mutant the night before restores the afternoon *KS* expression peak the day after. The transcript levels of *KS* in Col-0 and the starchless *adg1-1* mutant treated with 1% sucrose starting 13h before dawn (*filled symbols*). Control plants (*empty symbols*) were sprayed with H<sub>2</sub>O (See Figure 4 legend for a detailed description of the experiment). The relative expression level (REL) at the end of night of wild-type (Col-0) was set to 1. Values are means ( $\pm$  SD) of three independent replicates. Background shading: yellow, day; grey, night.

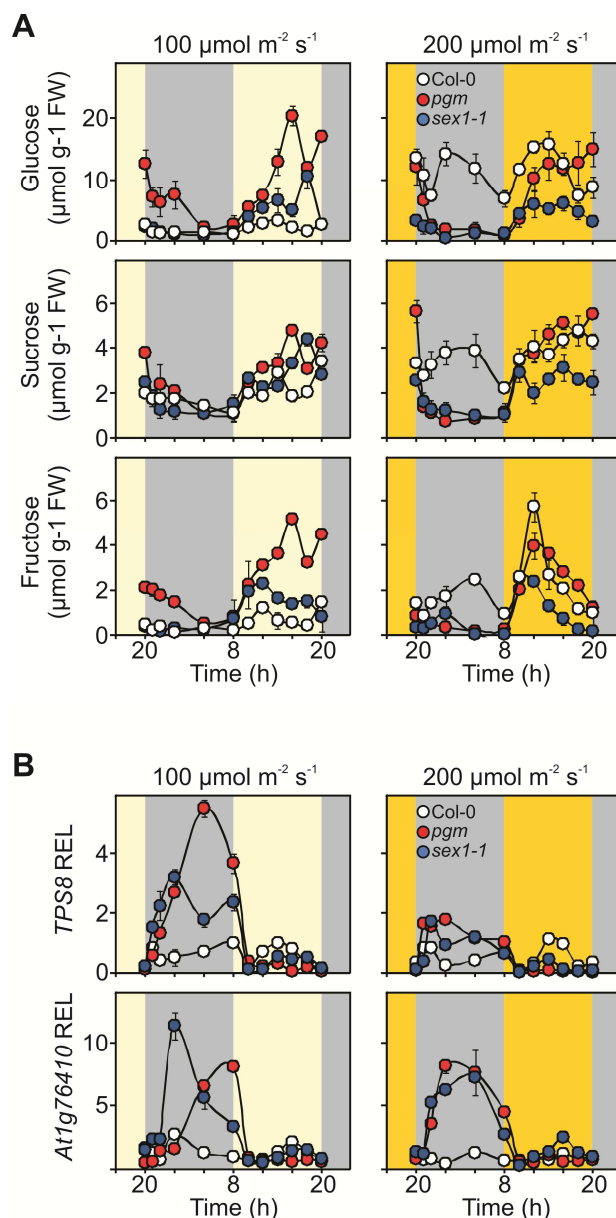

**Supplemental Figure 10.** Effect of light intensity on soluble sugar levels and on the expression of sugar-starvation marker genes in Col-0, *pgm* and *sex1-1* plants.

**(A)** Levels of glucose, sucrose, and fructose were measured in leaves of Col-0 (*empty circles*), *pgm* (*red circles*) and *sex1-1* (*blue circles*). Each point represents the mean ( $\pm$  SD) of three biological replicates.

**(B)** Transcript levels of *TPS8* and *At1g76410* in Col-0, *pgm*, and *sex1-1* plants grown at 100 or 200  $\mu\text{mol m}^{-2} \text{sec}^{-1}$  light intensity. The relative expression level (REL) at the end of night of the wild-type (Col-0) was set to 1. Values are means ( $\pm$  SD) of three independent replicates. Background shading: light yellow, day at 100  $\mu\text{mol m}^{-2} \text{sec}^{-1}$  irradiance; dark yellow, day at 200  $\mu\text{mol m}^{-2} \text{sec}^{-1}$  irradiance; grey, night. (See Figure 5 legend for a detailed description of the experiment).

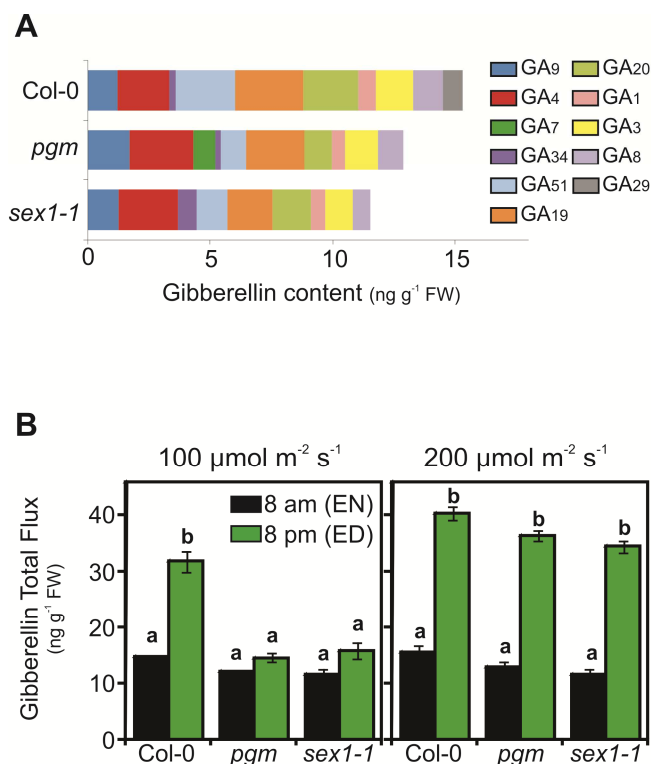

**Supplemental Figure 11.** Effect of light intensity on the GAs content in Col-0, *pgm* and *sex1-1* plants.

**(A)** Levels of GAs (ng g<sup>-1</sup> FW) in Col-0, *pgm* and *sex1-1* grown at 200 μmol m<sup>-2</sup> sec<sup>-1</sup> irradiance at the end of night (8 am). Values are means (± SD) of three independent replicates.

**(B)** Comparison of gibberellins total flux (ng g<sup>-1</sup> FW) at the end of night (8 am) and end of day (8 pm). Levels of gibberellins were measured in leaves of Col-0, *pgm* and *sex1-1* plants grown at 100 μmol m<sup>-2</sup> sec<sup>-1</sup> irradiance (*left panel*) and at 200 μmol m<sup>-2</sup> sec<sup>-1</sup> irradiance (*right panel*). Differences among genotypes at both light irradiance conditions and at the two time-point were evaluated by 2-way ANOVA (Bonferroni posttest, P < 0.05). Bars represent means (± SD) of three biological replicates.

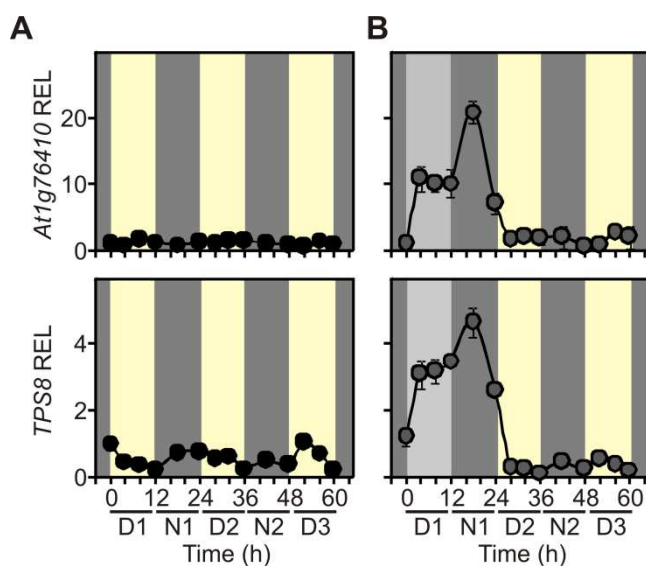

**Supplemental Figure 12.** Expression of sugar-starvation marker genes in plants exposed under low light intensity for one day.

**(A)** Col-0 plants grown in 12hL:12hD photoperiod at  $100 \mu\text{mol m}^{-2} \text{sec}^{-1}$  light intensity were used as controls. **(B)** Another group of plants was subjected to a 12-h treatment at low light intensity ( $10 \mu\text{mol m}^{-2} \text{sec}^{-1}$ ; light grey background) and then transferred again to normal light intensity (yellow background). See Figure 6 for details about this experiment. D = day, N = night. Expression in the control set of plants **(A)** at time 0 was set to 1. Values are means ( $\pm$  SD) of three replicates from two independent experiments.

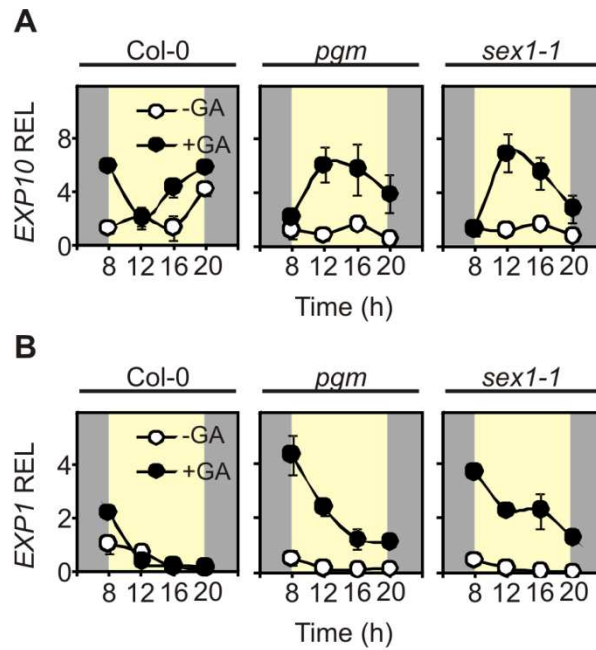

**Supplemental Figure 13.** Expression of *EXP10* and *EXP1* is modulated by gibberellins.

Plants were grown in a 12hL:12hD photoperiod and treated with GA<sub>4+7</sub> for 2 weeks before sampling. Plants were harvested every 4-h during the light phase.

Transcript levels of *EXP10* (**A**) and *EXP1* (**B**) were measured in leaves of control (*open circles*) and GA-treated samples (*filled circles*). The same analysis was performed in Col-0, *pgm* and *sex1-1*. Expression levels (REL) are expressed as relative units, assuming as unitary the value of Col-0 control (-GA) plants at the beginning of the day. Each value is the mean ( $\pm$  SD) of three independent measurements. Background shading: yellow, day; grey, night.

**Supplemental Table 1. List and description of the mutants used in the present work.**

| <b>Mutant</b> | <b>Locus (AGI)</b> | <b>Gene</b>                         | <b>Description</b>                                                                                                                                             | <b>References</b>                                          |
|---------------|--------------------|-------------------------------------|----------------------------------------------------------------------------------------------------------------------------------------------------------------|------------------------------------------------------------|
| <i>pgm</i>    | <i>At5g51820</i>   | <i>PGM</i>                          | Deficient in starch due to inactivation of a chloroplastic phosphoglucomutase isozyme, which converts the Glc 6-P into Glc 1-P.                                | (Caspar et al., 1985)                                      |
| <i>adg1-1</i> | <i>At5g48300</i>   | <i>ADG1</i>                         | Low starch mutant with a monogenic recessive mutation that has no measurable ADPGlc pyrophosphorylase (ADGase) activity                                        | (Lin et al., 1988a;b; Wang et al., 1998)                   |
| <i>sex1-1</i> | <i>At1g10760</i>   | <i>GWD1</i>                         | Mutant unable to metabolize the starch because of a point mutation decreasing the activity of $\alpha$ -glucan water dikinase, required for starch degradation | (Caspar et al., 1991; Yu et al., 2001; Ritte et al., 2002) |
| <i>sex4-3</i> | <i>At3g52180</i>   | <i>SEX4</i>                         | T-DNA insertion in this phosphoglucan phosphatase results in a starch excess phenotype (SALK_102567 line)                                                      | (Kötting et al., 2009)                                     |
| <i>lsf1-1</i> | <i>At3g01510</i>   | <i>LSF1</i><br>( <i>LIKE SEX4</i> ) | T-DNA insertion in the promoter region causes a null mutation and a starch excess phenotype                                                                    | (Comparot-Moss et al., 2011)                               |

**Supplemental Table 2. Levels of GAs (ng g<sup>-1</sup> FW) at the end of night (EN) and at the end of day (ED) in wild-type plants grown at 100 μmol m<sup>-2</sup> sec<sup>-1</sup> irradiance.**

|                   | EN                             | ED                             |
|-------------------|--------------------------------|--------------------------------|
| GA <sub>9</sub>   | 0.00<br>(±0.01)                | 3.10<br>(±0.50)                |
| GA <sub>4</sub>   | 2.33<br>(±0.13)                | 4.51<br>(±0.13)                |
| GA <sub>7</sub>   | 0.00<br>(±0.01)                | 16.24<br>(±0.98)               |
| GA <sub>34</sub>  | 1.58<br>(±0.05)                | 2.93<br>(±0.01)                |
| GA <sub>51</sub>  | 2.96<br>(±0.03)                | 1.75<br>(±0.07)                |
| GA <sub>19</sub>  | 2.05<br>(±0.01)                | 3.06<br>(±0.30)                |
| GA <sub>20</sub>  | 0.93<br>(±0.01)                | 1.54<br>(±0.04)                |
| GA <sub>1</sub>   | 0.79<br>(±0.35)                | 0.51<br>(±0.03)                |
| GA <sub>3</sub>   | 1.22<br>(±0.06)                | 1.03<br>(±0.06)                |
| GA <sub>8</sub>   | 1.70<br>(±0.01)                | 1.89<br>(±0.03)                |
| GA <sub>29</sub>  | 0.96<br>(±0.07)                | 0.45<br>(±0.04)                |
| <b>Total flux</b> | <b>14.55</b><br><b>(±0.72)</b> | <b>36.22</b><br><b>(±2.18)</b> |

Endogenous GAs was quantified in wild-type Col-0 plants both at the end of the night (EN, 8 am) and the end of the day (ED, 8 pm) by GC-MS/MS. All GAs of the table are part of the early 13-hydroxylation and non-13-hydroxylation pathways. GA<sub>1</sub>, GA<sub>3</sub>, GA<sub>4</sub>, and GA<sub>7</sub> are bioactive GAs, whereas the other GAs are precursors and deactivated GAs (GA<sub>8</sub> and GA<sub>34</sub>). Values shown are average ± SD of three replicates.



**Supplemental Table 3. Levels of GAs (ng g<sup>-1</sup> FW) at the end of day in Col-0, *pgm* and *sex1-1* mutants.**

|                  | Col-0            | <i>pgm</i>      | Ratio<br>(Col-0/ <i>pgm</i> ) | <i>sex1-1</i>    | Ratio<br>(Col-0/ <i>sex1-1</i> ) |
|------------------|------------------|-----------------|-------------------------------|------------------|----------------------------------|
| GA <sub>9</sub>  | 3.10<br>(±0.49)  | 1.91<br>(±0.01) | 0.62                          | 1.54<br>(±0.13)  | 0.49                             |
| GA <sub>4</sub>  | 4.51<br>(±0.13)  | 2.45<br>(±0.01) | 0.54                          | 2.00<br>(±0.08)  | 0.44                             |
| GA <sub>7</sub>  | 10.45<br>(±0.98) | n.d.            | n.d.                          | n.d.             | n.d.                             |
| GA <sub>34</sub> | 2.93<br>(±0.01)  | 1.20<br>(±0.01) | 0.41                          | 1.30<br>(±0.31)  | 0.44                             |
| GA <sub>51</sub> | 1.74<br>(±0.07)  | 1.36<br>(±0.04) | 0.78                          | 3.20<br>(±0.30)  | 1.84                             |
| GA <sub>19</sub> | 3.06<br>(±0.30)  | 2.94<br>(±0.09) | 0.96                          | 3.15<br>(±0.04)  | 1.03                             |
| GA <sub>20</sub> | 1.54<br>(±0.049) | 1.03<br>(±0.11) | 0.67                          | 1.37<br>(±0.47)  | 0.89                             |
| GA <sub>1</sub>  | 0.51<br>(±0.04)  | 0.42<br>(±0.01) | 0.82                          | 0.40<br>(±0.10)  | 0.78                             |
| GA <sub>3</sub>  | 1.03<br>(±0.06)  | 1.06<br>(±0.13) | 1.03                          | 1.22<br>(±0.07)  | 1.18                             |
| GA <sub>8</sub>  | 1.90<br>(±0.04)  | 0.98<br>(±0.23) | 0.51                          | 1.12<br>(±0.40)  | 0.59                             |
| GA <sub>29</sub> | 0.95<br>(±0.02)  | 1.15<br>(±0.04) | 1.21                          | 0.36<br>(±0.04)  | 0.38                             |
| Total flux       | 31.72<br>(±0.18) | 14.5<br>(±0.06) | 0.46                          | 15.66<br>(±0.18) | 0.49                             |

Endogenous GAs was quantified in wild-type Col-0, *pgm* and *sex1* plants by GC-MS/MS. All GAs of the table are part of the early 13-hydroxylation and non-13-hydroxylation pathways. GA<sub>1</sub>, GA<sub>3</sub>, GA<sub>4</sub>, and GA<sub>7</sub> are bioactive GAs, whereas the other GAs are precursors and deactivated GAs (GA<sub>8</sub> and GA<sub>34</sub>). Values shown are average ± SD of three replicates. n.d., below the detection limit.

**Supplemental Table 4. Primers used for gene expression analysis using real-time quantitative RT-PCR.**

| <b>Gene (AGI)</b>                      | <b>Forward primer</b>    | <b>Reverse primer</b>    |
|----------------------------------------|--------------------------|--------------------------|
| <i>At1g13440</i><br>( <i>GAPDH</i> )   | GAATCAACGGTTTCGGAAGA     | CTCGGTGGTGATGAAAGGAT     |
| <i>At2g37270</i><br>( <i>40SrRNA</i> ) | TCGACGCTGAGATTCAACAG     | CGTAACCGAAACGTCATCAA     |
| <i>At4g02780</i><br>( <i>CPS</i> )     | CCAGAAGCGGTTCCATACAT     | CCGTCCGTTAGGTTTCTCAA     |
| <i>At1g79460</i><br>( <i>KS</i> )      | TTCGGTTGCTTCTGGTTTCT     | GAGTCCAATCTCCGTTCCAA     |
| <i>At5g25900</i><br>( <i>KO</i> )      | CTAGTTCCCATTCGCTACGC     | TGAAGAGCACCAGCACAAAC     |
| <i>At1g15550</i><br>( <i>GA3ox1</i> )  | CCGAAGGTTTCACCATCACT     | GAGGGTGGAGTCGGTATGAG     |
| <i>At1g80340</i><br>( <i>GA3ox2</i> )  | CCAGCCACCACCTCAAATACTGTG | ATTAGGCCCGGCCATTGTATG    |
| <i>At4g21690</i><br>( <i>GA3ox3</i> )  | TCATGCCGAGTTCTGCAATGTG   | CCTAACGAGCCCATCAACATGC   |
| <i>At1g80330</i><br>( <i>GA3ox4</i> )  | CCTCATGATCACACCAAGTACTGC | TCTTCCACGGTGACACCAAGTG   |
| <i>At4g25420</i><br>( <i>GA20ox1</i> ) | GGTTTCTTCTCGTGGTCAA      | TTTCGGAGAGAGGCATATCAA    |
| <i>At5g51810</i><br>( <i>GA20ox2</i> ) | CAAGAGTTCGAGCAGTTTGGGAAG | TCGGAAATAGTCTCGGTTTACGC  |
| <i>At5g07200</i><br>( <i>GA20ox3</i> ) | ACATAGGCGACACCTTCATGGC   | TCCTTTCTCTCTCGCTGTTACC   |
| <i>At1g60980</i><br>( <i>GA20ox4</i> ) | GAACATTGGCGACACTTTAATGGC | TGGTGGCTTCACCACTTTGTCC   |
| <i>At1g44090</i><br>( <i>GA20ox5</i> ) | AACGTTGGAGACACCTTCATGGC  | ACTGCCCTGTGGTAACAACCTCC  |
| <i>At1g76410</i>                       | TCCGGTCGTTACCGAAACTCAC   | AGCACACTCCACGAGTTTCTCC   |
| <i>At3g59940</i>                       | ATACGATTCGGCTTCCGGTGAC   | ACCGCTTGCCACTCAAACCTC    |
| <i>At3g47340</i><br>( <i>DIN6</i> )    | AAGGTGCGGACGAGATCTTTGG   | ACTTGTGAAGAGCCTTGATCTTGC |
| <i>At1g70290</i><br>( <i>TPS8</i> )    | GTGGTTGTCAAGAGAGGTCAACAC | AGCTAGACCTTTGCTTACACCTTG |
| <i>At1g26770</i><br>( <i>EXP10</i> )   | AGCGAACAATAATGGCGGTTGG   | CTTCTCCTGCAAGGAACCCTTC   |

|                                     |                      |                       |
|-------------------------------------|----------------------|-----------------------|
| <i>At1g69530</i><br>( <i>EXP1</i> ) | CAATGGGAGGTGCTTGTGGA | GTTGTTCCGGTAAGGCGTTGT |
|-------------------------------------|----------------------|-----------------------|

**Supplemental Table 5. Primers used to test the insertion in the AGRİKOLA RNAi lines.**

| <b>Primer name</b> | <b>Position</b> | <b>Sequence 5'-3'</b> |
|--------------------|-----------------|-----------------------|
| <i>Agri51</i>      | 35S promoter    | CAACCACGTCTTCAAAGCAA  |
| <i>Agri56</i>      | Pdk intron      | CTGGGGTACCGAATTCCTC   |
| <i>Agri64</i>      | Cat intron      | CTTGCGCTGCAGTTATCATC  |
| <i>Agri69</i>      | OCS terminator  | AGGCGTCTCGCATATCTCAT  |
